# Supplementary material for: Ectopic A-lattice seams destabilize microtubules
Source: PubMed Central journal article supplement (PMC3921467; doi:10.1038/ncomms4094), 2014-01-27
Supplement: ncomms4094-s1.pdf [file ncomms4094-s1.pdf]

## Supplementary Information

| Study                        | EB        | Tag     | EB nM      | Tubulin         | Tubulin $\mu$ M | MgCl <sub>2</sub> mM | Temp °C | Growth | Shrinkage | Cat | Res  |
|------------------------------|-----------|---------|------------|-----------------|-----------------|----------------------|---------|--------|-----------|-----|------|
| Vitre et al <sup>39</sup>    | EB1 (Mm)  | His     | 500 - 2000 | mammalian brain | 10              | 1                    | 36      | 2x     | -2x       | 2x  | 8x   |
| Manna et al <sup>56</sup>    | EB1 (Hs)  | cleaved | 500 - 2000 | mammalian brain | 20              | 1.4                  | 30      | 1.2x   | -2x       | -2x | 1.5x |
| Dixit et al <sup>57</sup>    | EB1 (Hs)  | cleaved | 250        | mammalian brain | 22              | 2                    | 22      | ~      | 1.1x      | ~   | ~    |
| Li et al <sup>58</sup>       | EB1 (Dm)  | cleaved | 100 - 800  | mammalian brain | 15              | 4                    | 25      | 1.3x   | ~         | ~*  | ~    |
| Komarova et al <sup>45</sup> | EB3 (Hs)  | cleaved | 200 - 1000 | mammalian brain | 15              | 4                    | 25      | 5x     | 1.5x      | 9x  | 3x   |
| Bieling et al <sup>47</sup>  | Mal3 (Sp) | cleaved | 200        | mammalian brain | 10              | 6                    | 30      | ~      | ~         | 3x  | ~**  |
| Katsuki et al <sup>37</sup>  | Mal3 (Sp) | His     | 50 - 500   | <i>S. pombe</i> | 4.5             | 1                    | 25      | ~      | -3x       | ~   | 6x   |
| This study                   | Mal3 (Sp) | His     | 2 - 200    | <i>S. pombe</i> | 4.5             | 1                    | 25      | 1.2x   | -2x       | ~   | 15x  |

### Supplementary Table 1 EB protein effects on microtubule dynamics in vitro

A summary of published observations on the effect of EB family proteins on microtubule dynamics in vitro. All significant changes in rates relative to tubulin only controls are given ( $p < 0.05$ ).

\*No change in catastrophe frequency was found when all data was averaged. However Li et al<sup>58</sup> report that if the increase in catastrophe frequency of tubulin plus EB1 compared to tubulin alone is calculated in individual experiments and then averaged they found a 1.5x increase in catastrophe frequency.

\*\*No rescue events were observed in any conditions.

~: no significant change compared to tubulin only ( $p > 0.05$ ). Mm: *Mus musculus*, Hs: *Homo sapiens*, Sp: *Schizosaccharomyces pombe*.

increase, decrease in rate (slower growth or shrinkage). The largest change relative to the control is given.

### Supplementary references

56. Manna, T., Honnappa, S., Steinmetz, M.O. & Wilson, L. Suppression of microtubule dynamic instability by the +TIP protein EB1 and its modulation by the CAP-Gly domain of p150glued. *Biochemistry* **47**, 779-86 (2008).
57. Dixit, R. et al. Microtubule plus-end tracking by CLIP-170 requires EB1. *Proc Natl Acad Sci U S A* **106**, 492-7 (2009).
58. Li, W. et al. Reconstitution of dynamic microtubules with *Drosophila* XMAP215, EB1, and Sentin. *J Cell Biol* **199**, 849-62 (2012).
